# Supplementary material for: Calcium-induced conformational changes in the regulatory domain of the human mitochondrial ATP-Mg/Pi carrier
Source: PubMed Central journal article supplement (PMC4562336; doi:10.1016/j.bbabio.2015.07.002), 2015-10
Supplement: mmc2.pdf [file mmc2.pdf]

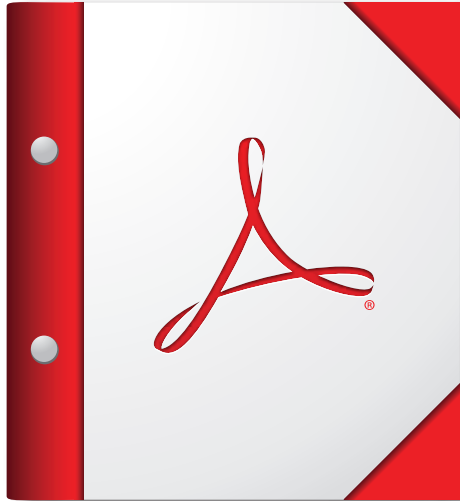

**For the best experience, open this PDF portfolio in  
Acrobat 9 or Adobe Reader 9, or later.**

[Get Adobe Reader Now!](#)
